# Supplementary material for: Solubility of Amino Acids in the Eutectic Solvent Constituted by Sodium Acetate Trihydrate and Urea and in Its Mixture with Water
Source: MDPI journal article supplement (doi:10.3390/ijms24021550), 2023-01-12
Supplement: s1 [file s1]

# **SOLUBILITY OF AMINO ACIDS IN THE EUTECTIC SOLVENT CONSTITUTED BY SODIUM ACETATE TRIHYDRATE AND UREA AND ITS AQUEOUS FORMULATION**

**Cristina Gallego, Héctor Rodríguez, Ana Soto\***

CRETUS, Department of Chemical Engineering, Universidade de Santiago de Compostela, E-15782, Santiago de Compostela, Spain.

## **SUPPLEMENTARY MATERIALS**

---

\* Corresponding author. E-mail: ana.soto@usc.es

**Table S1. Solubilities (mole fraction) of different amino acids in the eutectic solvent and in its mixture with water, 50:50 (wt:wt), at different temperatures and 0.1 MPa.**

| <i>Eutectic</i>                     |         |                  |           |                           |              |            |           |
|-------------------------------------|---------|------------------|-----------|---------------------------|--------------|------------|-----------|
| T (K)                               | Glycine | $\beta$ -Alanine | L-Proline | trans-4-Hydroxy-L-proline | L-Lysine-HCl | L-Arginine | L-Cystine |
| 308.15                              | 0.1411  | 0.2223           | 0.1590    | 0.1182                    | 0.0850       | 0.0910     | 0.0007    |
| 318.15                              | 0.1557  | 0.2497           | 0.1980    | 0.1266                    | 0.0942       | 0.1053     | 0.0018    |
| 328.15                              | 0.1682  | 0.2887           | 0.2395    | 0.1422                    | 0.1064       | 0.1212     | 0.0043    |
| 338.15                              | 0.1812  | 0.3312           | 0.3037    | 0.1600                    | 0.1181       | 0.1452     | 0.0098    |
| <i>Eutectic:water 50:50 (wt:wt)</i> |         |                  |           |                           |              |            |           |
| T (K)                               | Glycine | $\beta$ -Alanine | L-Proline | trans-4-Hydroxy-L-proline | L-Lysine-HCl | L-Arginine | L-Cystine |
| 298.15                              | 0.0581  | 0.1371           | 0.2813    | 0.0515                    | 0.1050       | 0.0214     | 0.0005    |
| 308.15                              | 0.0743  | 0.1508           | 0.2952    | 0.0578                    | 0.1205       | 0.0317     | 0.0013    |
| 318.15                              | 0.0935  | 0.1714           | 0.3181    | 0.0707                    | 0.1376       | 0.0501     | 0.0039    |
| 328.15                              | 0.1112  | 0.1966           | 0.3401    | 0.0801                    | 0.1574       | 0.0793     | 0.0073    |

**Table S2. Sources and purities of amino acids used in this work.**

| Amino acid                 | Source        | Purity (wt%) |
|----------------------------|---------------|--------------|
| Glycine                    | Sigma-Aldrich | >99.0        |
| $\beta$ -Alanine           | Sigma-Aldrich | >99.0        |
| L-Proline                  | Panreac       | >99.0        |
| trans-4-Hydroxy-L-proline  | Sigma-Aldrich | >99.0        |
| L-Lysine monohydrochloride | Sigma-Aldrich | >99.5        |
| L-Arginine                 | Sigma-Aldrich | >98.0        |
| L-Cystine                  | Sigma-Aldrich | >98.0        |

**Table S3. Experimental data used for calibration curves of glycine.**

| <i>Eutectic</i>              |                                      | <i>Eutectic:water 50:50 (wt:wt)</i> |                                                   |
|------------------------------|--------------------------------------|-------------------------------------|---------------------------------------------------|
| mass fraction of glycine (w) | refractive index (308.15 K, 0.1 MPa) | mass fraction of glycine (w)        | density (g·cm <sup>-3</sup> ) (298.15 K, 0.1 MPa) |
| 0.0000                       | 1.44599                              | 0.0000                              | 1.150100                                          |
| 0.0202                       | 1.44814                              | 0.0249                              | 1.157460                                          |
| 0.0399                       | 1.44988                              | 0.0508                              | 1.165090                                          |
| 0.0601                       | 1.45175                              | 0.0751                              | 1.172140                                          |
| 0.0798                       | 1.45351                              | 0.1000                              | 1.179150                                          |
| 0.0996                       | 1.45544                              | 0.1249                              | 1.186430                                          |

$u(T)=0.01$  K.  $u(P)=5$  kPa.  $u(w)=0.0002$ .  $u(n_D)=0.0001$   $u(\rho)=0.0001$

$$\text{Refractive index} = 0.0936 \cdot x + 1.4461 \quad (\text{S.1})$$

$$R^2 = 0.9988$$

$$\text{Density} = 0.2903 \cdot x + 1.1503 \quad (\text{S.2})$$

$$R^2 = 0.9998$$

**Table S4. Experimental data used for calibration curves of  $\beta$ -alanine.**

| <i>Eutectic</i>                       |                                         | <i>Eutectic:water 50:50 (wt:wt)</i>   |                                                      |
|---------------------------------------|-----------------------------------------|---------------------------------------|------------------------------------------------------|
| mass fraction of $\beta$ -alanine (w) | refractive index<br>(308.15 K, 0.1 MPa) | mass fraction of $\beta$ -alanine (w) | density (g·cm <sup>-3</sup> )<br>(298.15 K, 0.1 MPa) |
| 0.0000                                | 1.44600                                 | 0.0000                                | 1.150104                                             |
| 0.0302                                | 1.44875                                 | 0.0500                                | 1.160782                                             |
| 0.0600                                | 1.45145                                 | 0.1001                                | 1.170575                                             |
| 0.0916                                | 1.45409                                 | 0.1500                                | 1.180568                                             |
| 0.1202                                | 1.45637                                 | 0.2002                                | 1.190214                                             |
| 0.1498                                | 1.45906                                 | 0.2500                                | 1.199625                                             |

u(T)=0.01 K. u(P)=5 kPa. u(w)=0.0002. u(n<sub>D</sub>)=0.0001 u( $\rho$ )=0.0003

$$\text{Refractive index} = 0.0864 \cdot x + 1.4461 \quad (\text{S.3})$$

$$R^2 = 0.9991$$

$$\text{Density} = 0.1976 \cdot x + 1.1506 \quad (\text{S.4})$$

$$R^2 = 0.9996$$

**Table S5. Experimental data used for calibration curves of L-proline.**

| <i>Eutectic</i>                |                                         | <i>Eutectic:water 50:50 (wt:wt)</i> |                                                      |
|--------------------------------|-----------------------------------------|-------------------------------------|------------------------------------------------------|
| mass fraction of L-proline (w) | refractive index<br>(308.15 K, 0.1 MPa) | mass fraction of L-proline (w)      | density (g·cm <sup>-3</sup> )<br>(298.15 K, 0.1 MPa) |
| 0.0301                         | 1.44841                                 | 0.0000                              | 1.150104                                             |
| 0.0604                         | 1.45110                                 | 0.1010                              | 1.165964                                             |
| 0.0902                         | 1.45360                                 | 0.1996                              | 1.181118                                             |
| 0.1200                         | 1.45632                                 | 0.3005                              | 1.196699                                             |
| 0.1508                         | 1.45891                                 | 0.4015                              | 1.211770                                             |
| 0.1791                         | 1.46152                                 | 0.4976                              | 1.226005                                             |

u(T)=0.01 K. u(P)=5 kPa. u(w)=0.0002. u(n<sub>D</sub>)=0.00006 u( $\rho$ )=0.0003

$$\text{Refractive index} = 0.0877 \cdot x + 1.4458 \quad (\text{S.5})$$

$$R^2 = 0.9962$$

$$\text{Density} = 0.1526 \cdot x + 1.1505 \quad (\text{S.6})$$

$$R^2 = 0.9999$$

**Table S6. Experimental data used for calibration curves of trans-4-Hydroxy-L-proline.**

| <i>Eutectic</i>                                   |                                         | <i>Eutectic:water 50:50 (wt:wt)</i>               |                                                      |
|---------------------------------------------------|-----------------------------------------|---------------------------------------------------|------------------------------------------------------|
| mass fraction of<br>trans-4-Hydroxy-L-proline (w) | refractive index<br>(308.15 K, 0.1 MPa) | mass fraction of<br>trans-4-Hydroxy-L-proline (w) | density (g·cm <sup>-3</sup> )<br>(298.15 K, 0.1 MPa) |
| 0.0000                                            | 1.44579                                 | 0.0000                                            | 1.150251                                             |
| 0.0265                                            | 1.44854                                 | 0.0501                                            | 1.162772                                             |
| 0.0500                                            | 1.45077                                 | 0.0999                                            | 1.175436                                             |
| 0.0768                                            | 1.45342                                 | 0.1492                                            | 1.187954                                             |
| 0.1012                                            | 1.45571                                 | 0.1994                                            | 1.199934                                             |
| 0.1254                                            | 1.45800                                 | 0.2501                                            | 1.212897                                             |

u(T)=0.01 K. u(P)=5 kPa. u(w)=0.0002. u(n<sub>D</sub>)=0.00007 u(ρ)=0.0002

$$\text{Refractive index} = 0.0971 \cdot x + 1.4459 \quad (\text{S.7})$$

$$R^2 = 0.9998$$

$$\text{Density} = 0.2502 \cdot x + 1.1503 \quad (\text{S.8})$$

$$R^2 = 0.9999$$

**Table S7. Experimental data used for calibration curves of L-lysine·HCl.**

| <i>Eutectic</i>               |                                         | <i>Eutectic:water 50:50 (wt:wt)</i> |                                                      |
|-------------------------------|-----------------------------------------|-------------------------------------|------------------------------------------------------|
| mass fraction of L-lysine (w) | refractive index<br>(308.15 K, 0.1 MPa) | mass fraction of L-lysine (w)       | density (g·cm <sup>-3</sup> )<br>(298.15 K, 0.1 MPa) |
| 0.0000                        | 1.44579                                 | 0.0000                              | 1.150251                                             |
| 0.0203                        | 1.44817                                 | 0.0512                              | 1.158801                                             |
| 0.0402                        | 1.45034                                 | 0.1000                              | 1.166958                                             |
| 0.0600                        | 1.45262                                 | 0.1495                              | 1.175155                                             |
| 0.0801                        | 1.45488                                 | 0.1999                              | 1.183417                                             |
| 0.1002                        | 1.45713                                 | 0.2495                              | 1.191512                                             |

u(T)=0.01 K. u(P)=5 kPa. u(w)=0.0002. u(n<sub>D</sub>)=0.0001 u(ρ)=0.0001

$$\text{Refractive index} = 0.1132 \cdot x + 1.4459 \quad (\text{S.9})$$

$$R^2 = 0.9999$$

$$\text{Density} = 0.1660 \cdot x + 1.1503 \quad (\text{S.10})$$

$$R^2 = 1.0000$$

**Table S8. Experimental data used for calibration curves of L-arginine.**

| <i>Eutectic</i>                 |                                         | <i>Eutectic:water 50:50 (wt:wt)</i> |                                                      |
|---------------------------------|-----------------------------------------|-------------------------------------|------------------------------------------------------|
| mass fraction of L-arginine (w) | refractive index<br>(308.15 K, 0.1 MPa) | mass fraction of L-arginine (w)     | density (g·cm <sup>-3</sup> )<br>(298.15 K, 0.1 MPa) |
| 0.0000                          | 1.44576                                 | 0.0000                              | 1.150978                                             |
| 0.0203                          | 1.44837                                 | 0.0252                              | 1.154937                                             |
| 0.0400                          | 1.45068                                 | 0.0505                              | 1.159018                                             |
| 0.0600                          | 1.45300                                 | 0.0757                              | 1.162995                                             |
| 0.0801                          | 1.45519                                 | 0.1003                              | 1.167040                                             |
| 0.1001                          | 1.45766                                 | 0.1251                              | 1.170880                                             |

u(T)=0.01 K. u(P)=5 kPa. u(w)=0.0002. u(n<sub>D</sub>)=0.0001 u(ρ)=0.00006

$$\text{Refractive index} = 0.1176 \cdot x + 1.4459 \quad (\text{S.11})$$

$$R^2 = 0.9997$$

$$\text{Density} = 0.1599 \cdot x + 1.1509 \quad (\text{S.12})$$

$$R^2 = 0.9999$$

**Table S9. Experimental data used for calibration curves of L-cystine.**

| <i>Eutectic</i>                |                                         | <i>Eutectic:water 50:50 (wt:wt)</i> |                                                      |
|--------------------------------|-----------------------------------------|-------------------------------------|------------------------------------------------------|
| mass fraction of L-cystine (w) | refractive index<br>(338.15 K, 0.1 MPa) | mass fraction of L-cystine (w)      | density (g·cm <sup>-3</sup> )<br>(328.15 K, 0.1 MPa) |
| 0.0000                         | 1.43923                                 | 0.0000                              | 1.132343                                             |
| 0.0039                         | 1.43996                                 | 0.0040                              | 1.133966                                             |
| 0.0064                         | 1.44041                                 | 0.0080                              | 1.135490                                             |
| 0.0086                         | 1.44084                                 | 0.0120                              | 1.137244                                             |
| 0.0121                         | 1.44146                                 | 0.0160                              | 1.138934                                             |

u(T)=0.01 K. u(P)=5 kPa. u(w)=0.0002. u(n<sub>D</sub>)=0.00003 u(ρ)=0.00005

$$\text{Refractive index} = 0.1858 \cdot x + 1.4392 \quad (\text{S.13})$$

$$R^2 = 0.9999$$

$$\text{Density} = 0.4111 \cdot x + 1.1323 \quad (\text{S.14})$$

$$R^2 = 0.9997$$
